# Supplementary material for: Morphological variation of hydroxyapatite grown in aqueous solution based on simulated body fluid
Source: Royal Society of Chemistry journal article supplement (doi:10.1039/c1ce06114c), 2011-12-06
Supplement: c1ce06114c.pdf [file c1ce06114c.pdf]

## Electric Supplementary Information (ESI)

### Morphological Variation of Hydroxyapatite in Aqueous Solution Based on Simulated Bdy Fluid

Toru Kobayashi,<sup>a</sup> Shohei Ono,<sup>a</sup> Sho Hirakura,<sup>a</sup> Yuya Oaki,<sup>a</sup> and Hiroaki Imai\*<sup>a</sup>

<sup>a</sup>Department of Applied Chemistry, Faculty of Science and Technology, Keio University, 3-14-1 Hiyoshi, Kohoku, Yokohama 223-8522, Japan.

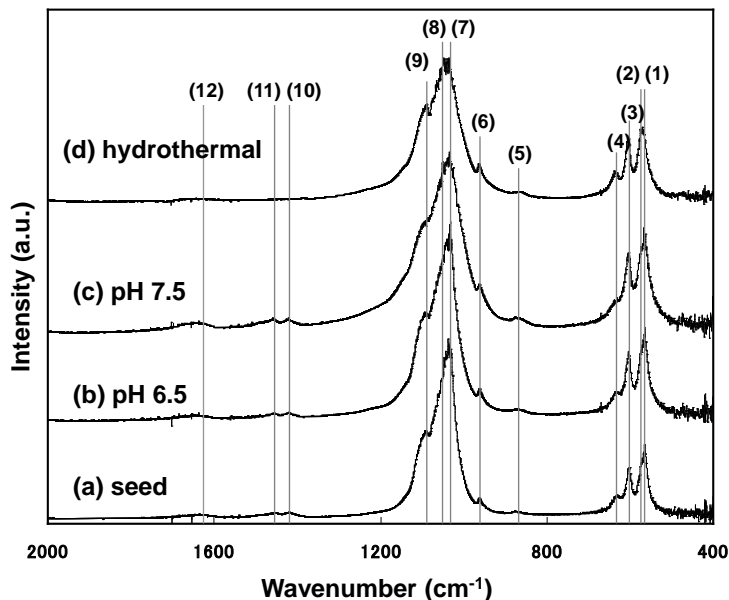

**Figure S1.** FTIR spectra of a seed (a) and HAP crystals prepared in the SBF-based solution (b,c,d).

All the absorption bands are assigned to the vibration of HAP crystal.<sup>35,36</sup>

- (1) 561 Triply degenerated bending mode,  $\nu_{4c}$ , of the O–P–O bonds of the phosphate group
- (2) 574 Triply degenerated bending mode,  $\nu_{4b}$ , of the O–P–O bonds of the phosphate group
- (3) 602 Triply degenerated bending mode,  $\nu_{4a}$ , of the O–P–O bonds of the phosphate group
- (4) 631 Librational mode,  $\nu_L$ , of the hydroxyl group
- (5) 875 Characteristic peak of hydrogen phosphate group (nondistinguishable peak)
- (6) 962 Nondegenerated symmetric stretching mode,  $\nu_{1s}$ , of the P–O bonds of the phosphate group
- (7) 1032 Triply degenerated asymmetric stretching mode,  $\nu_{3c}$ , of the P–O bond of the phosphate group
- (8) 1046 Triply degenerated asymmetric stretching mode,  $\nu_{3b}$ , of the P–O bond of the phosphate group
- (9) 1087 Triply degenerated asymmetric stretching mode,  $\nu_{3a}$ , of the P–O bond of the phosphate group
- (10) 1430 Stretching mode ( $\nu_1$ ) of the  $\text{CO}_3^{2-}$  group in B-type CAP
- (11) 1465 Characteristic stretching mode ( $\nu_1$ ) of the  $\text{CO}_3^{2-}$  group in A-type CAP
- (12) 1630 Bending mode,  $\nu_2$  for water associated with HAP
